# Supplementary material
Source: Research Square preprint supplement (doi:10.21203/rs.3.rs-9692790/v1)

# Figure Abstract

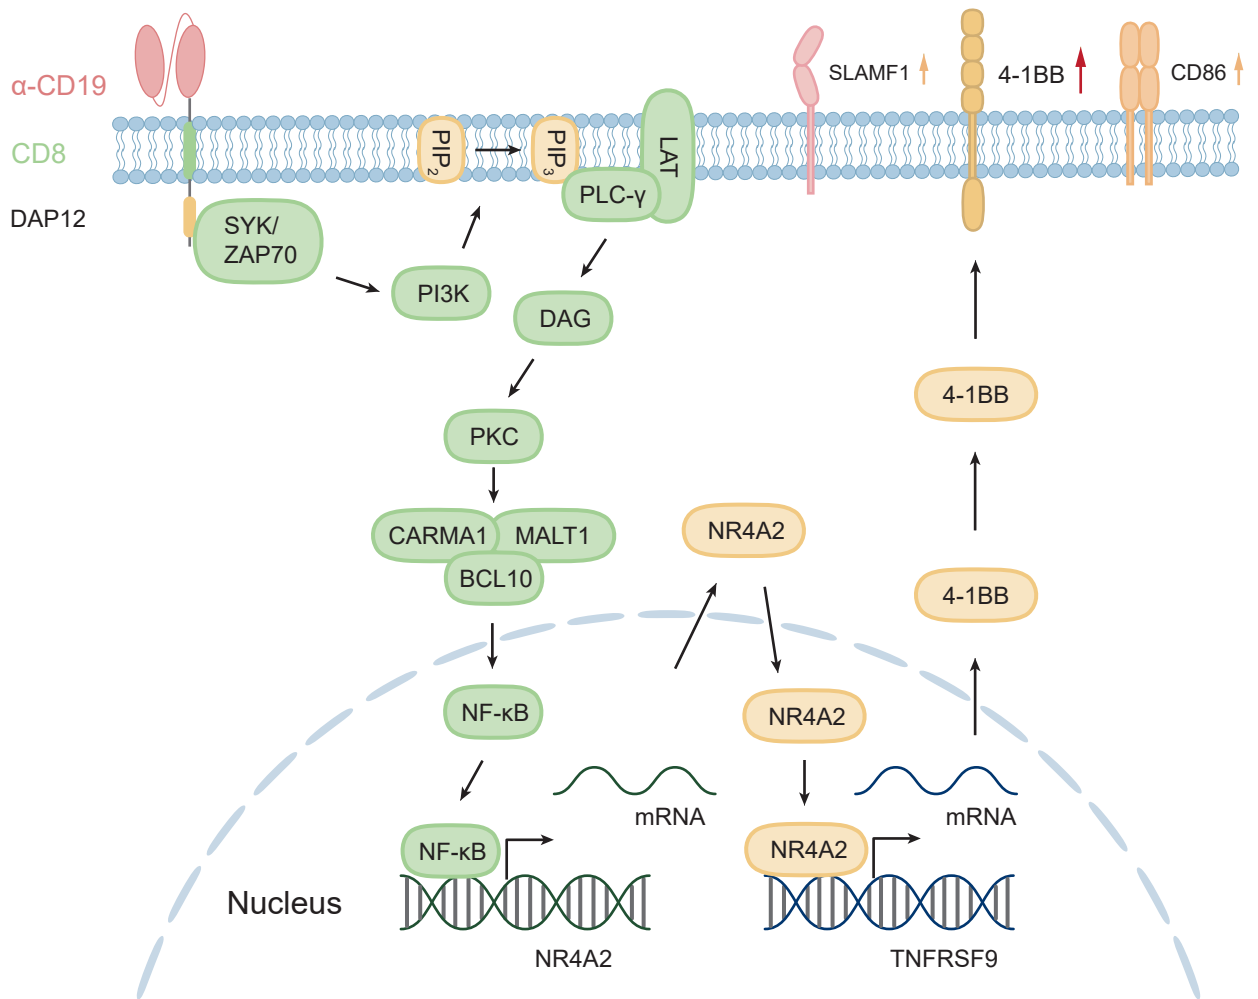

Supplement: Supplementary file 1 [file 2e879f0cd36c93b62d80e795.pdf]
